# Supplementary material for: Noticeable characteristics of conventional and nonconventional hydrogen bonds in the binary systems of chalcogenoaldehyde and chalcogenocarboxylic acid derivatives
Source: Royal Society of Chemistry journal article supplement (doi:10.1039/d4ra07498j), 2024-01-01
Supplement: d4ra07498j1.pdf [file d4ra07498j1.pdf]

## The noticeable characteristics of conventional and nonconventional hydrogen bonds in the binary systems of chalcogenoaldehyde and chalcogenocarboxylic acid derivatives

Le Thi Tu Quyen,<sup>1</sup> Nguyen Tien Trung\*<sup>1,2</sup>

<sup>1</sup>Laboratory of Computational Chemistry and Modelling (LCCM), Quy Nhon University, 170 An Duong Vuong Street, Quy Nhon City 590000, Vietnam

<sup>2</sup>Faculty of Natural Sciences, Quy Nhon University, 170 An Duong Vuong Street, Quy Nhon City 590000, Vietnam

### SUPPORTING INFORMATION

**Table S1a.** The H $\cdots$ Z interaction distance ( $r_{H\cdots Z}$ ), Electron density [ $\rho(r)$ ], Laplacian of electron density [ $\nabla^2(\rho)$ ], individual energy of hydrogen bond ( $E_{HB}$ ) and the ratio between the intermolecular distance and the sum of van der Waals radii of the H, Z atoms ( $r_{H\cdots Z} / \sum r_{vdW}$ ) of HZ-RZ complexes (R= H, F, Cl, Br, CH<sub>3</sub>, NH<sub>2</sub>; Z= O, S, Se, Te)

| Complex                | Hydrogen bonds     | $r_{H\cdots Z}$<br>(Å) | $\rho(r)$<br>(au) | $\nabla^2(\rho)$<br>(au) | $E_{HB}$<br>(kJ.mol <sup>-1</sup> ) | $r_{H\cdots Z} / \sum r_{vdW}$ |
|------------------------|--------------------|------------------------|-------------------|--------------------------|-------------------------------------|--------------------------------|
| HO-HO                  | C1-H4 $\cdots$ O6  | 2.35                   | 0.012             | 0.046                    | -10.0                               | 0.86                           |
|                        | O7-H8 $\cdots$ O2  | 1.76                   | 0.040             | 0.094                    | -51.9                               | 0.65                           |
| HO-FO                  | C1-H4 $\cdots$ O6  | 2.39                   | 0.011             | 0.043                    | -9.2                                | 0.88                           |
|                        | O7-H8 $\cdots$ O2  | 1.70                   | 0.046             | 0.099                    | -62.2                               | 0.62                           |
| HO-ClO                 | C1-H4 $\cdots$ O6  | 2.39                   | 0.011             | 0.043                    | -9.1                                | 0.88                           |
|                        | O7-H8 $\cdots$ O2  | 1.70                   | 0.046             | 0.098                    | -61.9                               | 0.63                           |
| HO-BrO                 | C1-H4 $\cdots$ O6  | 2.38                   | 0.011             | 0.043                    | -9.2                                | 0.88                           |
|                        | O7-H8 $\cdots$ O2  | 1.70                   | 0.047             | 0.098                    | -62.8                               | 0.62                           |
| HO-CH <sub>3</sub> O   | C1-H4 $\cdots$ O6  | 2.33                   | 0.013             | 0.049                    | -10.6                               | 0.86                           |
|                        | O7-H8 $\cdots$ O2  | 1.78                   | 0.038             | 0.093                    | -48.7                               | 0.65                           |
| HO-NH <sub>2</sub> O   | C1-H4 $\cdots$ O6  | 2.29                   | 0.014             | 0.054                    | -11.7                               | 0.84                           |
|                        | O7-H8 $\cdots$ O2  | 1.76                   | 0.040             | 0.095                    | -51.1                               | 0.65                           |
| HS-HS                  | C1-H4 $\cdots$ S6  | 2.72                   | 0.012             | 0.031                    | -8.1                                | 0.91                           |
|                        | O7-H8 $\cdots$ S2  | 2.25                   | 0.028             | 0.043                    | -25.3                               | 0.75                           |
| HS-FS                  | C1-H4 $\cdots$ S6  | 2.74                   | 0.011             | 0.030                    | -7.6                                | 0.91                           |
|                        | O7-H8 $\cdots$ S2  | 2.19                   | 0.032             | 0.043                    | -30.0                               | 0.73                           |
| HS-ClS                 | C1-H4 $\cdots$ S6  | 2.74                   | 0.011             | 0.030                    | -7.7                                | 0.91                           |
|                        | O7-H8 $\cdots$ S2  | 2.20                   | 0.031             | 0.043                    | -29.2                               | 0.73                           |
| HS-BrS                 | C1-H4 $\cdots$ S6  | 2.73                   | 0.011             | 0.030                    | -7.7                                | 0.91                           |
|                        | O7-H8 $\cdots$ S2  | 2.19                   | 0.032             | 0.043                    | -29.7                               | 0.73                           |
| HS-CH <sub>3</sub> S   | C1-H4 $\cdots$ S6  | 2.72                   | 0.012             | 0.031                    | -8.2                                | 0.91                           |
|                        | O7-H8 $\cdots$ S2  | 2.27                   | 0.027             | 0.044                    | -24.2                               | 0.76                           |
| HS-NH <sub>2</sub> S   | C1-H4 $\cdots$ S6  | 2.67                   | 0.013             | 0.034                    | -9.1                                | 0.89                           |
|                        | O7-H8 $\cdots$ S2  | 2.26                   | 0.027             | 0.044                    | -25.0                               | 0.75                           |
| HSe-HSe                | C1-H4 $\cdots$ Se6 | 2.75                   | 0.013             | 0.030                    | -8.9                                | 0.89                           |
|                        | O7-H8 $\cdots$ Se2 | 2.34                   | 0.027             | 0.037                    | -23.4                               | 0.75                           |
| HSe-FSe                | C1-H4 $\cdots$ Se6 | 2.77                   | 0.012             | 0.030                    | -8.5                                | 0.89                           |
|                        | O7-H8 $\cdots$ Se2 | 2.28                   | 0.031             | 0.036                    | -27.2                               | 0.74                           |
| HSe-ClSe               | C1-H4 $\cdots$ Se6 | 2.76                   | 0.013             | 0.030                    | -8.6                                | 0.89                           |
|                        | O7-H8 $\cdots$ Se2 | 2.29                   | 0.030             | 0.036                    | -26.4                               | 0.74                           |
| HSe-BrSe               | C1-H4 $\cdots$ Se6 | 2.76                   | 0.013             | 0.030                    | -8.6                                | 0.89                           |
|                        | O7-H8 $\cdots$ Se2 | 2.28                   | 0.031             | 0.036                    | -26.9                               | 0.74                           |
| HSe-CH <sub>3</sub> Se | C1-H4 $\cdots$ Se6 | 2.75                   | 0.013             | 0.030                    | -8.9                                | 0.89                           |
|                        | O7-H8 $\cdots$ Se2 | 2.35                   | 0.027             | 0.038                    | -22.7                               | 0.76                           |
| HSe-NH <sub>2</sub> Se | C1-H4 $\cdots$ Se6 | 2.70                   | 0.014             | 0.033                    | -9.7                                | 0.87                           |
|                        | O7-H8 $\cdots$ Se2 | 2.33                   | 0.027             | 0.038                    | -23.4                               | 0.75                           |
| HTe-HTe                | C1-H4 $\cdots$ Te6 | 2.91                   | 0.012             | 0.025                    | -7.7                                | 0.89                           |
|                        | O7-H8 $\cdots$ Te2 | 2.50                   | 0.026             | 0.030                    | -19.3                               | 0.77                           |
| HTe-FTe                | C1-H4 $\cdots$ Te6 | 2.93                   | 0.012             | 0.025                    | -7.5                                | 0.90                           |

|                             |             |      |       |       |       |      |
|-----------------------------|-------------|------|-------|-------|-------|------|
|                             | O7-H8...Te2 | 2.45 | 0.029 | 0.028 | -22.2 | 0.75 |
| <b>HTe-ClTe</b>             | C1-H4...Te6 | 2.93 | 0.012 | 0.025 | -7.5  | 0.90 |
|                             | O7-H8...Te2 | 2.46 | 0.028 | 0.029 | -21.6 | 0.75 |
| <b>HTe-BrTe</b>             | C1-H4...Te6 | 2.92 | 0.012 | 0.025 | -7.6  | 0.90 |
|                             | O7-H8...Te2 | 2.45 | 0.028 | 0.028 | -21.8 | 0.75 |
| <b>HTe-CH<sub>3</sub>Te</b> | C1-H4...Te6 | 2.91 | 0.012 | 0.026 | -7.8  | 0.89 |
|                             | O7-H8...Te2 | 2.50 | 0.025 | 0.030 | -19.2 | 0.77 |
| <b>HTe-NH<sub>2</sub>Te</b> | C1-H4...Te6 | 2.86 | 0.013 | 0.027 | -8.5  | 0.88 |
|                             | O7-H8...Te2 | 2.49 | 0.026 | 0.030 | -20.0 | 0.76 |

**Table S1b.** The H...Z interaction distance ( $r_{H...Z}$ ), Electron density [ $\rho(r)$ ], Laplacian of electron density [ $\nabla^2(\rho)$ ], individual energy of hydrogen bond ( $E_{HB}$ ) and the ratio between the intermolecular distance and the sum of van der Waals radii of the H, Z atoms ( $r_{H...Z}/$

$\sum r_{vdW}$ ) of **FZ-RZ** complexes (R= H, F, Cl, Br, CH<sub>3</sub>, NH<sub>2</sub>; Z= O, S, Se, Te)

| Complex                     | Hydrogen bonds | $r_{H...Z}$<br>(Å) | $\rho(r)$<br>(au) | $\nabla^2(\rho)$<br>(au) | $E_{HB}$<br>(kJ.mol <sup>-1</sup> ) | $r_{H...Z}/\sum r_{vdW}$ |
|-----------------------------|----------------|--------------------|-------------------|--------------------------|-------------------------------------|--------------------------|
| <b>FO-HO</b>                | C1-H4...O6     | 2.31               | 0.013             | 0.052                    | -11.1                               | 0.85                     |
|                             | O7-H8...O2     | 1.85               | 0.031             | 0.089                    | -37.6                               | 0.68                     |
| <b>FO-FO</b>                | C1-H4...O6     | 2.34               | 0.012             | 0.049                    | -10.2                               | 0.86                     |
|                             | O7-H8...O2     | 1.78               | 0.037             | 0.096                    | -47.0                               | 0.65                     |
| <b>FO-ClO</b>               | C1-H4...O6     | 2.35               | 0.012             | 0.048                    | -10.0                               | 0.86                     |
|                             | O7-H8...O2     | 1.78               | 0.036             | 0.095                    | -45.9                               | 0.66                     |
| <b>FO-BrO</b>               | C1-H4...O6     | 2.35               | 0.012             | 0.048                    | -10.0                               | 0.86                     |
|                             | O7-H8...O2     | 1.78               | 0.036             | 0.095                    | -46.3                               | 0.66                     |
| <b>FO-CH<sub>3</sub>O</b>   | C1-H4...O6     | 2.28               | 0.014             | 0.056                    | -12.0                               | 0.84                     |
|                             | O7-H8...O2     | 1.87               | 0.030             | 0.087                    | -35.2                               | 0.69                     |
| <b>FO-NH<sub>2</sub>O</b>   | C1-H4...O6     | 2.22               | 0.016             | 0.062                    | -13.7                               | 0.82                     |
|                             | O7-H8...O2     | 1.85               | 0.031             | 0.088                    | -37.1                               | 0.68                     |
| <b>FS-HS</b>                | C1-H4...S6     | 2.69               | 0.012             | 0.032                    | -8.5                                | 0.90                     |
|                             | O7-H8...S2     | 2.31               | 0.024             | 0.043                    | -21.2                               | 0.77                     |
| <b>FS-FS</b>                | C1-H4...S6     | 2.71               | 0.012             | 0.032                    | -8.2                                | 0.90                     |
|                             | O7-H8...S2     | 2.24               | 0.028             | 0.044                    | -25.6                               | 0.75                     |
| <b>FS-ClS</b>               | C1-H4...S6     | 2.71               | 0.012             | 0.031                    | -8.1                                | 0.90                     |
|                             | O7-H8...S2     | 2.25               | 0.027             | 0.044                    | -24.6                               | 0.75                     |
| <b>FS-BrS</b>               | C1-H4...S6     | 2.71               | 0.012             | 0.031                    | -8.2                                | 0.90                     |
|                             | O7-H8...S2     | 2.25               | 0.027             | 0.044                    | -25.0                               | 0.75                     |
| <b>FS-CH<sub>3</sub>S</b>   | C1-H4...S6     | 2.69               | 0.013             | 0.032                    | -8.7                                | 0.90                     |
|                             | O7-H8...S2     | 2.32               | 0.023             | 0.043                    | -20.3                               | 0.77                     |
| <b>FS-NH<sub>2</sub>S</b>   | C1-H4...S6     | 2.63               | 0.014             | 0.036                    | -9.9                                | 0.88                     |
|                             | O7-H8...S2     | 2.31               | 0.024             | 0.044                    | -21.2                               | 0.77                     |
| <b>FSe-HSe</b>              | C1-H4...Se6    | 2.72               | 0.014             | 0.031                    | -9.5                                | 0.88                     |
|                             | O7-H8...Se2    | 2.38               | 0.025             | 0.038                    | -20.7                               | 0.77                     |
| <b>FSe-FSe</b>              | C1-H4...Se6    | 2.73               | 0.013             | 0.031                    | -9.3                                | 0.88                     |
|                             | O7-H8...Se2    | 2.31               | 0.028             | 0.038                    | -24.1                               | 0.75                     |
| <b>FSe-ClSe</b>             | C1-H4...Se6    | 2.74               | 0.013             | 0.031                    | -9.2                                | 0.88                     |
|                             | O7-H8...Se2    | 2.33               | 0.027             | 0.038                    | -23.3                               | 0.75                     |
| <b>FSe-BrSe</b>             | C1-H4...Se6    | 2.73               | 0.013             | 0.031                    | -9.2                                | 0.88                     |
|                             | O7-H8...Se2    | 2.32               | 0.028             | 0.038                    | -23.7                               | 0.75                     |
| <b>FSe-CH<sub>3</sub>Se</b> | C1-H4...Se6    | 2.72               | 0.014             | 0.032                    | -9.6                                | 0.88                     |
|                             | O7-H8...Se2    | 2.39               | 0.024             | 0.038                    | -20.0                               | 0.77                     |
| <b>FSe-NH<sub>2</sub>Se</b> | C1-H4...Se6    | 2.67               | 0.015             | 0.034                    | -10.7                               | 0.86                     |
|                             | O7-H8...Se2    | 2.37               | 0.024             | 0.039                    | -20.7                               | 0.77                     |
| <b>FTe-HTe</b>              | C1-H4...Te6    | 2.88               | 0.013             | 0.026                    | -8.3                                | 0.88                     |
|                             | O7-H8...Te2    | 2.53               | 0.024             | 0.031                    | -17.6                               | 0.78                     |
| <b>FTe-FTe</b>              | C1-H4...Te6    | 2.89               | 0.013             | 0.026                    | -8.2                                | 0.88                     |
|                             | O7-H8...Te2    | 2.47               | 0.026             | 0.029                    | -20.4                               | 0.76                     |
| <b>FTe-ClTe</b>             | C1-H4...Te6    | 2.89               | 0.013             | 0.026                    | -8.1                                | 0.89                     |
|                             | O7-H8...Te2    | 2.48               | 0.026             | 0.030                    | -19.7                               | 0.76                     |
| <b>FTe-BrTe</b>             | C1-H4...Te6    | 2.89               | 0.013             | 0.026                    | -8.1                                | 0.89                     |
|                             | O7-H8...Te2    | 2.48               | 0.026             | 0.030                    | -19.9                               | 0.76                     |
| <b>FTe-CH<sub>3</sub>Te</b> | C1-H4...Te6    | 2.88               | 0.013             | 0.027                    | -8.5                                | 0.88                     |
|                             | O7-H8...Te2    | 2.53               | 0.023             | 0.031                    | -17.5                               | 0.78                     |
| <b>FTe-NH<sub>2</sub>Te</b> | C1-H4...Te6    | 2.82               | 0.014             | 0.029                    | -9.4                                | 0.87                     |

**Table S2.** The maximum electrostatic potential ( $V_{s,max}$ ) (kJ.mol<sup>-1</sup>) and minimum electrostatic potential ( $V_{s,min}$ ) (kJ.mol<sup>-1</sup>) in XCHZ and RCZOH monomer with X= H, F; R= H, F, Cl, Br, CH<sub>3</sub>, NH<sub>2</sub>; Z= O, S, Se, Te

|                                     | HCOOH  | FCOOH  | CICOOH  | BrCOOH  | CH <sub>3</sub> COOH  | NH <sub>2</sub> COOH  |
|-------------------------------------|--------|--------|---------|---------|-----------------------|-----------------------|
| $V_{s,max}$ (kJ.mol <sup>-1</sup> ) | 246.1  | 306.4  | 287.5   | 284.4   | 224.1                 | 227.9                 |
| $V_{s,min}$ (kJ.mol <sup>-1</sup> ) | -144.6 | -121.4 | -120.8  | -118.9  | -157.1                | -172.1                |
|                                     | HCSOH  | FCSOH  | CICSOH  | BrCSOH  | CH <sub>3</sub> CSOH  | NH <sub>2</sub> CSOH  |
| $V_{s,max}$ (kJ.mol <sup>-1</sup> ) | 242.5  | 299.3  | 274.1   | 269.9   | 224.2                 | 226.1                 |
| $V_{s,min}$ (kJ.mol <sup>-1</sup> ) | -86.5  | -78.1  | -76.6   | -75.3   | -93.7                 | -104.5                |
|                                     | HcSeOH | FcSeOH | CICSeOH | BrCSeOH | CH <sub>3</sub> CSeOH | NH <sub>2</sub> CSeOH |
| $V_{s,max}$ (kJ.mol <sup>-1</sup> ) | 243.8  | 299.8  | 271.6   | 267.3   | 225.8                 | 227.7                 |
| $V_{s,min}$ (kJ.mol <sup>-1</sup> ) | -83.9  | -77.0  | -75.9   | -75.1   | -91.1                 | -102.5                |
|                                     | HCTeOH | FTeOH  | CICTeOH | BrCTeOH | CH <sub>3</sub> CTeOH | NH <sub>2</sub> CTeOH |
| $V_{s,max}$ (kJ.mol <sup>-1</sup> ) | 243.6  | 298.1  | 267.6   | 262.7   | 226.7                 | 244.3                 |
| $V_{s,min}$ (kJ.mol <sup>-1</sup> ) | -79.0  | -73.6  | -72.7   | -71.9   | -85.5                 | -96.8                 |
|                                     | HCHO   | HCHS   | HCHSe   | HCHTe   |                       |                       |
| $V_{s,max}$ (kJ.mol <sup>-1</sup> ) | 130.8  | 114.9  | 116.0   | 111.0   |                       |                       |
| $V_{s,min}$ (kJ.mol <sup>-1</sup> ) | -146.6 | -88.7  | -84.8   | -78.9   |                       |                       |
|                                     | FCHO   | FCHS   | FCHSe   | FCHTe   |                       |                       |
| $V_{s,max}$ (kJ.mol <sup>-1</sup> ) | 179.0  | 160.7  | 159.5   | 153.4   |                       |                       |
| $V_{s,min}$ (kJ.mol <sup>-1</sup> ) | -117.0 | -74.6  | -73.1   | -69.7   |                       |                       |

**Table S3.** The NBO charge of H4, H8, Z2, and Z6 atoms in XZ-RZ complexes with X= H, F; R= H, F, Cl, Br, CH<sub>3</sub>, NH<sub>2</sub>; Z= O, S, Se, Te

|       | HO-HO   | HO-FO   | HO-CIO   | HO-BrO   | HO-CH <sub>3</sub> O   | HO-NH <sub>2</sub> O   |
|-------|---------|---------|----------|----------|------------------------|------------------------|
| q(H8) | 0.505   | 0.516   | 0.514    | 0.513    | 0.508                  | 0.512                  |
| q(Z6) | -0.628  | -0.627  | -0.600   | -0.600   | -0.644                 | -0.692                 |
| q(H4) | 0.158   | 0.157   | 0.155    | 0.155    | 0.159                  | 0.163                  |
| q(Z2) | -0.546  | -0.548  | -0.546   | -0.545   | -0.546                 | -0.548                 |
|       | HS-HS   | HS-FS   | HS-CIS   | HS-BrS   | HS-CH <sub>3</sub> S   | HS-NH <sub>2</sub> S   |
| q(H8) | 0.486   | 0.498   | 0.493    | 0.491    | 0.492                  | 0.500                  |
| q(Z6) | -0.153  | -0.181  | -0.092   | -0.078   | -0.167                 | -0.302                 |
| q(H4) | 0.212   | 0.213   | 0.211    | 0.211    | 0.213                  | 0.218                  |
| q(Z2) | 0.052   | 0.060   | 0.063    | 0.065    | 0.049                  | 0.044                  |
|       | HSe-HSe | HSe-FSe | HSe-CISe | HSe-BrSe | HSe-CH <sub>3</sub> Se | HSe-NH <sub>2</sub> Se |
| q(H8) | 0.479   | 0.491   | 0.487    | 0.484    | 0.487                  | 0.495                  |
| q(Z6) | -0.093  | -0.135  | -0.032   | -0.015   | -0.110                 | -0.272                 |
| q(H4) | 0.212   | 0.213   | 0.211    | 0.211    | 0.213                  | 0.218                  |
| q(Z2) | 0.150   | 0.161   | 0.165    | 0.167    | 0.147                  | 0.141                  |
|       | HTe-HTe | HTe-FTe | HTe-CITe | HTe-BrTe | HTe-CH <sub>3</sub> Te | HTe-NH <sub>2</sub> Te |
| q(H8) | 0.472   | 0.482   | 0.478    | 0.475    | 0.480                  | 0.488                  |
| q(Z6) | 0.000   | -0.064  | 0.059    | 0.083    | -0.025                 | -0.229                 |
| q(H4) | 0.207   | 0.209   | 0.206    | 0.206    | 0.209                  | 0.213                  |
| q(Z2) | 0.297   | 0.314   | 0.317    | 0.319    | 0.296                  | 0.290                  |
|       | FO-HO   | FO-FO   | FO-CIO   | FO-BrO   | FO-CH <sub>3</sub> O   | FO-NH <sub>2</sub> O   |
| q(H8) | 0.508   | 0.519   | 0.517    | 0.516    | 0.509                  | 0.514                  |
| q(Z6) | -0.628  | -0.628  | -0.602   | -0.603   | -0.646                 | -0.695                 |
| q(H4) | 0.159   | 0.158   | 0.156    | 0.156    | 0.160                  | 0.166                  |
| q(Z2) | -0.563  | -0.568  | -0.565   | -0.564   | -0.561                 | -0.564                 |
|       | FS-HS   | FS-FS   | FS-CIS   | FS-BrS   | FS-CH <sub>3</sub> S   | FS-NH <sub>2</sub> S   |
| q(H8) | 0.491   | 0.504   | 0.500    | 0.497    | 0.496                  | 0.504                  |
| q(Z6) | -0.148  | -0.177  | -0.088   | -0.075   | -0.163                 | -0.298                 |
| q(H4) | 0.194   | 0.196   | 0.194    | 0.193    | 0.196                  | 0.201                  |
| q(Z2) | -0.007  | -0.002  | 0.001    | 0.003    | -0.009                 | -0.015                 |
|       | FSe-HSe | FSe-FSe | FSe-CISe | FSe-BrSe | FSe-CH <sub>3</sub> Se | FSe-NH <sub>2</sub> Se |
| q(H8) | 0.485   | 0.498   | 0.494    | 0.491    | 0.492                  | 0.500                  |
| q(Z6) | -0.088  | -0.130  | -0.029   | -0.011   | -0.106                 | -0.268                 |
| q(H4) | 0.193   | 0.195   | 0.192    | 0.192    | 0.195                  | 0.200                  |
| q(Z2) | 0.073   | 0.080   | 0.084    | 0.086    | 0.070                  | 0.062                  |
|       | FTe-HTe | FTe-FTe | FTe-CITe | FTe-BrTe | FTe-CH <sub>3</sub> Te | FTe-NH <sub>2</sub> Te |
| q(H8) | 0.478   | 0.490   | 0.486    | 0.483    | 0.485                  | 0.494                  |

|              |       |        |       |       |        |        |
|--------------|-------|--------|-------|-------|--------|--------|
| <b>q(Z6)</b> | 0.006 | -0.059 | 0.063 | 0.086 | -0.020 | -0.224 |
| <b>q(H4)</b> | 0.184 | 0.186  | 0.184 | 0.183 | 0.186  | 0.191  |
| <b>q(Z2)</b> | 0.193 | 0.205  | 0.209 | 0.210 | 0.190  | 0.182  |

**Table S4a.** The extrapolated HF total energies  $E_{CBS}^{HF}$  (a.u.), CCSD(T) correlation energies  $E_{CBS}^{corr}$  (au), the CCSD(T) total energies extrapolated at the CBS limit  $E_{CBS}^{CCSD(T)}$  (au), interaction energies extrapolated at the CBS limit  $\Delta E_{CBS}^*$  (kJ.mol<sup>-1</sup>), and parameters of CBS extrapolation ( $\alpha$ ,  $B$ ) for the structures involved in the **XO-HO**, **XO-FO**, and **XO-NH<sub>2</sub>O** (with X= H, F)

|                           | $E_{CBS}^{HF}$<br>(a.u) | $E_{CBS}^{corr}$<br>(a.u) | $E_{CBS}^{CCSD(T)}$<br>(a.u) | $\Delta E_{CBS}^*$<br>(kJ.mol <sup>-1</sup> ) | $\alpha^{(i)}$ | $B^{(i)}$ |
|---------------------------|-------------------------|---------------------------|------------------------------|-----------------------------------------------|----------------|-----------|
| <b>HO-HO</b>              | -794825.0               | -3117.0                   | -797942.0                    | -36.4                                         | 1.33           | 3948.88   |
| <b>HO-FO</b>              | -1054567.0              | -3823.8                   | -1058390.7                   | -43.5                                         | 1.35           | 5544.40   |
| <b>HO-NH<sub>2</sub>O</b> | -939415.3               | -3735.8                   | -640355.8                    | -37.5                                         | 1.32           | 4535.75   |
| <b>FO-HO</b>              | -1054585.9              | -3829.6                   | -1058415.4                   | -32.1                                         | 1.35           | 5539.86   |
| <b>FO-FO</b>              | -1314323.9              | -4538.9                   | -1318862.8                   | -37.8                                         | 1.36           | 7265.11   |
| <b>FO-NH<sub>2</sub>O</b> | -1199179.1              | -4448.7                   | -1203627.7                   | -36.4                                         | 1.33           | 6075.88   |

<sup>(i)</sup> Parameters of CBS exponential extrapolation in the form of  $E^{HF}(X) = E_{CBS}^{HF} + B \cdot \exp(-\alpha X)$ , for the Hartree-Fock total energies calculated at HF/aug-cc-pVnZ (n = 2 for DZ, n = 3 for TZ, and n = 4 for QZ) level of theory.

**Table S4b.** The extrapolated HF total energies  $E_{CBS}^{HF}$  (au), CCSD(T) correlation energies  $E_{CBS}^{corr}$  (au), the CCSD(T) total energies extrapolated at the CBS limit  $E_{CBS}^{CCSD(T)}$  (au), and parameters of CBS extrapolation ( $\alpha$ ,  $B$ ) for the **XCHO**, and **RCOOH** monomers (with X= H, F; R= H, F, NH<sub>2</sub>)

|                           | $E_{CBS}^{HF}$<br>(a.u) | $E_{CBS}^{corr}$<br>(a.u) | $E_{CBS}^{CCSD(T)}$<br>(a.u) | $\alpha^{(i)}$ | $B^{(i)}$ |
|---------------------------|-------------------------|---------------------------|------------------------------|----------------|-----------|
| <b>HCHO</b>               | -299036.3               | -1205.4                   | -300241.7                    | 1.35           | 1549.98   |
| <b>FCHO</b>               | -558797.2               | -1922.2                   | -560719.4                    | 1.36           | 3122.33   |
| <b>HCOOH</b>              | -495766.3               | -1897.6                   | -497663.9                    | 1.32           | 2418.50   |
| <b>FCOOH</b>              | -755501.3               | -2604.2                   | -758105.5                    | 1.34           | 4013.27   |
| <b>NH<sub>2</sub>COOH</b> | -640355.8               | -2516.1                   | -642871.9                    | 1.32           | 3017.81   |

<sup>(i)</sup> Parameters of CBS exponential extrapolation in the form of  $E^{HF}(X) = E_{CBS}^{HF} + B \cdot \exp(-\alpha X)$ , for the Hartree-Fock total energies calculated at HF/aug-cc-pVnZ (n = 2 for DZ, n = 3 for TZ, and n = 4 for QZ) level of theory.

The HF total energy [ $E^{HF}(X)$ ] from CBS exponential extrapolation at HF/aug-cc-pVnZ (n = 2, 3, 4) in the form:

$$E^{HF}(X) = E_{CBS}^{HF} + B \cdot \exp(-\alpha X),$$

in which, the  $E_{CBS}^{HF}$  is the HF total energy at the CBS limit.

The CCSD(T) total energies extrapolated at the CBS limit  $E_{CBS}^{CCSD(T)}$  in the form:

$$E_{CBS}^{CCSD(T)} = E_{CBS}^{HF} + E_{CBS}^{corr},$$

in which, the correlation energy at CCSD(T)/aug-cc-pVnZ is fitted with the expression of the power form:

$$E^{corr}(X) = E_{CBS}^{corr} + A \cdot X^{-3}$$

The two-point fitting scheme for n = 2 and n = 3 and eliminating the fitting parameter A, the CCSD(T) correlation energy at the CBS limit can be obtained by the expression:

$$E_{CBS}^{corr} = \frac{E^{corr}(DZ) \cdot 2^3 - E^{corr}(TZ) \cdot 3^3}{2^3 - 3^3}$$

in which, the CCSD(T) correlation energies are obtained using the two basis sets aug-cc-pVDZ and aug-cc-pVTZ on the MP2/aug-cc-pVTZ geometries:

$$E^{corr}(DZ) = E^{CCSD(T)}(DZ) - E^{HF}(DZ); E^{corr}(TZ) = E^{CCSD(T)}(TZ) - E^{HF}(TZ)$$

**Table S5.** The percentage contribution of energy components to the stability of **XZ-RZ** complexes with X= H, F; R= H, F, Cl, Br, CH<sub>3</sub>, NH<sub>2</sub>; Z= O, S, Se, Te at def2-TZVPD basis set

| Complex                   | %eles | %disp | %ind | Complex                   | %eles | %disp | %ind |
|---------------------------|-------|-------|------|---------------------------|-------|-------|------|
| <b>HO-HO</b>              | 51.2  | 17.0  | 31.9 | <b>FO-HO</b>              | 52.0  | 17.9  | 30.0 |
| <b>HO-FO</b>              | 51.2  | 15.9  | 32.9 | <b>FO-FO</b>              | 51.5  | 17.3  | 31.2 |
| <b>HO-ClO</b>             | 50.4  | 16.3  | 33.2 | <b>FO-ClO</b>             | 50.6  | 17.8  | 31.6 |
| <b>HO-BrO</b>             | 50.0  | 16.4  | 33.6 | <b>FO-BrO</b>             | 50.2  | 17.9  | 32.0 |
| <b>HO-CH<sub>3</sub>O</b> | 51.2  | 17.6  | 31.2 | <b>FO-CH<sub>3</sub>O</b> | 52.3  | 18.4  | 29.3 |

|                        |      |      |      |                        |      |      |      |
|------------------------|------|------|------|------------------------|------|------|------|
| HO-NH <sub>2</sub> O   | 51.5 | 17.4 | 31.1 | FO-NH <sub>2</sub> O   | 53.0 | 18.0 | 29.1 |
| HS-HS                  | 40.2 | 19.8 | 40.0 | FS-HS                  | 39.7 | 20.8 | 39.4 |
| HS-FS                  | 40.0 | 18.8 | 41.2 | FS-FS                  | 39.0 | 20.1 | 40.9 |
| HS-ClS                 | 39.4 | 19.4 | 41.2 | FS-ClS                 | 38.5 | 20.7 | 40.8 |
| HS-BrS                 | 39.1 | 19.4 | 41.5 | FS-BrS                 | 38.1 | 20.8 | 41.1 |
| HS-CH <sub>3</sub> S   | 40.2 | 20.3 | 39.5 | FS-CH <sub>3</sub> S   | 40.0 | 21.2 | 38.8 |
| HS-NH <sub>2</sub> S   | 40.6 | 19.9 | 39.4 | FS-NH <sub>2</sub> S   | 40.8 | 20.6 | 38.6 |
| HSe-HSe                | 35.4 | 18.8 | 45.8 | FSe-HSe                | 34.9 | 19.6 | 45.6 |
| HSe-FSe                | 35.6 | 18.3 | 46.1 | FSe-FSe                | 34.7 | 19.3 | 46.1 |
| HSe-ClSe               | 34.7 | 18.7 | 46.6 | FSe-ClSe               | 33.9 | 19.7 | 46.4 |
| HSe-BrSe               | 34.8 | 18.5 | 46.7 | FSe-BrSe               | 33.9 | 19.5 | 46.6 |
| HSe-CH <sub>3</sub> Se | 35.0 | 19.2 | 45.8 | FSe-CH <sub>3</sub> Se | 34.7 | 19.9 | 45.3 |
| HSe-NH <sub>2</sub> Se | 35.5 | 18.9 | 45.6 | FSe-NH <sub>2</sub> Se | 35.6 | 19.4 | 45.0 |
| HTe-HTe                | 46.0 | 0.2  | 53.8 | FTe-HTe                | 46.0 | 0.3  | 53.8 |
| HTe-FTe                | 46.0 | 0.5  | 53.4 | FTe-FTe                | 45.7 | 0.6  | 53.6 |
| HTe-ClTe               | 46.1 | 0.4  | 53.5 | FTe-ClTe               | 45.7 | 0.4  | 53.9 |
| HTe-BrTe               | 46.2 | 0.3  | 53.5 | FTe-BrTe               | 46.1 | 0.4  | 53.5 |
| HTe-CH <sub>3</sub> Te | 46.2 | 0.4  | 53.4 | FTe-CH <sub>3</sub> Te | 46.0 | 0.5  | 53.5 |
| HTe-NH <sub>2</sub> Te | 45.7 | 0.5  | 53.8 | FTe-NH <sub>2</sub> Te | 45.7 | 0.7  | 53.6 |

**Table S6a.** Change in bond lengths and stretching frequencies of O-H and C<sub>sp2</sub>-H bonds in HZ-RZ complexes, with R= H, F, Cl, Br, CH<sub>3</sub>, NH<sub>2</sub>; Z= O, S, Se, Te

| Complex                 | HO-HO   | HO-FO   | HO-ClO   | HO-BrO   | HO-CH <sub>3</sub> O   | HO-NH <sub>2</sub> O   |
|-------------------------|---------|---------|----------|----------|------------------------|------------------------|
| $\Delta r(C_{sp2}-H)$   | -0.0051 | -0.0058 | -0.0056  | -0.0055  | -0.0052                | -0.0059                |
| $\Delta r(O-H)$         | 0.0186  | 0.0240  | 0.0237   | 0.0240   | 0.0169                 | 0.0182                 |
| $\Delta \nu(C_{sp2}-H)$ | 78.5    | 86.9    | 83.5     | 82.5     | 79.5                   | 81.0                   |
| $\Delta \nu(O-H)$       | -375.4  | -481.4  | -473.3   | -477.9   | -342.8                 | -373.0                 |
| Complex                 | HS-HS   | HS-FS   | HS-ClS   | HS-BrS   | HS-CH <sub>3</sub> S   | HS-NH <sub>2</sub> S   |
| $\Delta r(C_{sp2}-H)$   | 0.0002  | -0.0011 | -0.0007  | -0.0006  | 0.0001                 | 0.0001                 |
| $\Delta r(O-H)$         | 0.0166  | 0.0224  | 0.0214   | 0.0218   | 0.0153                 | 0.0161                 |
| $\Delta \nu(C_{sp2}-H)$ | 1.4     | 19.5    | 13.8     | 12.0     | 2.6                    | 2.8                    |
| $\Delta \nu(O-H)$       | -346.5  | -472.7  | -444.7   | -451.7   | -318.8                 | -342.2                 |
| Complex                 | HSe-HSe | HSe-FSe | HSe-ClSe | HSe-BrSe | HSe-CH <sub>3</sub> Se | HSe-NH <sub>2</sub> Se |
| $\Delta r(C_{sp2}-H)$   | 0.0013  | -0.0001 | 0.0003   | 0.0004   | 0.0011                 | 0.0013                 |
| $\Delta r(O-H)$         | 0.0181  | 0.0242  | 0.0228   | 0.0233   | 0.0169                 | 0.0178                 |
| $\Delta \nu(C_{sp2}-H)$ | -15.9   | 3.2     | -2.4     | -4.8     | -14.0                  | -15.6                  |
| $\Delta \nu(O-H)$       | -373.8  | -509.0  | -473.2   | -479.9   | -349.9                 | -375.3                 |
| Complex                 | HTe-HTe | HTe-FTe | HTe-ClTe | HTe-BrTe | HTe-CH <sub>3</sub> Te | HTe-NH <sub>2</sub> Te |
| $\Delta r(C_{sp2}-H)$   | 0.0029  | 0.0017  | 0.0020   | 0.0021   | 0.0027                 | 0.0031                 |
| $\Delta r(O-H)$         | 0.0187  | 0.0256  | 0.0238   | 0.0241   | 0.0185                 | 0.0197                 |
| $\Delta \nu(C_{sp2}-H)$ | -40.3   | -24.4   | -29.0    | -34.6    | -38.3                  | -42.7                  |
| $\Delta \nu(O-H)$       | -386.9  | -535.4  | -490.8   | -491.4   | -382.3                 | -414.6                 |

**Table S6b.** Change in bond lengths and stretching frequencies of O-H and C<sub>sp2</sub>-H bonds in FZ-RZ complexes, with R= H, F, Cl, Br, CH<sub>3</sub>, NH<sub>2</sub>; Z= O, S, Se, Te

| Complex                 | FO-HO   | FO-FO   | FO-ClO   | FO-BrO   | FO-CH <sub>3</sub> O   | FO-NH <sub>2</sub> O   |
|-------------------------|---------|---------|----------|----------|------------------------|------------------------|
| $\Delta r(C_{sp2}-H)$   | -0.0017 | -0.0020 | -0.0019  | -0.0019  | -0.0018                | -0.0018                |
| $\Delta r(O-H)$         | 0.0114  | 0.0157  | 0.0149   | 0.0149   | 0.0102                 | 0.0112                 |
| $\Delta \nu(C_{sp2}-H)$ | 32.9    | 37.8    | 35.7     | 35.0     | 34.2                   | 34.8                   |
| $\Delta \nu(O-H)$       | -228.1  | -313.4  | -296.9   | -296.2   | -206.5                 | -230.5                 |
| Complex                 | FS-HS   | FS-FS   | FS-ClS   | FS-BrS   | FS-CH <sub>3</sub> S   | FS-NH <sub>2</sub> S   |
| $\Delta r(C_{sp2}-H)$   | 0.0010  | 0.0000  | 0.0002   | 0.0003   | 0.0009                 | 0.0012                 |
| $\Delta r(O-H)$         | 0.0120  | 0.0170  | 0.0158   | 0.0160   | 0.0110                 | 0.0117                 |
| $\Delta \nu(C_{sp2}-H)$ | -10.4   | 4.0     | 0.6      | -0.9     | -9.6                   | -12.3                  |
| $\Delta \nu(O-H)$       | -252.6  | -362.2  | -331.4   | -334.8   | -231.0                 | -251.5                 |
| Complex                 | FSe-HSe | FSe-FSe | FSe-ClSe | FSe-BrSe | FSe-CH <sub>3</sub> Se | FSe-NH <sub>2</sub> Se |
| $\Delta r(C_{sp2}-H)$   | 0.0021  | 0.0010  | 0.0012   | 0.0013   | 0.0020                 | 0.0023                 |
| $\Delta r(O-H)$         | 0.0141  | 0.0195  | 0.0180   | 0.0183   | 0.0131                 | 0.0139                 |
| $\Delta \nu(C_{sp2}-H)$ | -27.2   | -11.3   | -14.2    | -15.8    | -25.7                  | -30.5                  |
| $\Delta \nu(O-H)$       | -293.5  | -413.6  | -376.5   | -380.9   | -273.0                 | -294.8                 |
| Complex                 | FTe-HTe | FTe-FTe | FTe-ClTe | FTe-BrTe | FTe-CH <sub>3</sub> Te | FTe-NH <sub>2</sub> Te |
| $\Delta r(C_{sp2}-H)$   | 0.0029  | 0.0020  | 0.0021   | 0.0021   | 0.0028                 | 0.0033                 |

|                                             |        |        |        |        |        |        |
|---------------------------------------------|--------|--------|--------|--------|--------|--------|
| $\Delta r(\text{O-H})$                      | 0.0157 | 0.0218 | 0.0202 | 0.0204 | 0.0153 | 0.0163 |
| $\Delta v(\text{C}_{\text{sp}^2}\text{-H})$ | -42.6  | -29.1  | -30.2  | -31.7  | -41.0  | -48.2  |
| $\Delta v(\text{O-H})$                      | -325.8 | -459.2 | -419.0 | -421.0 | -318.0 | -345.8 |

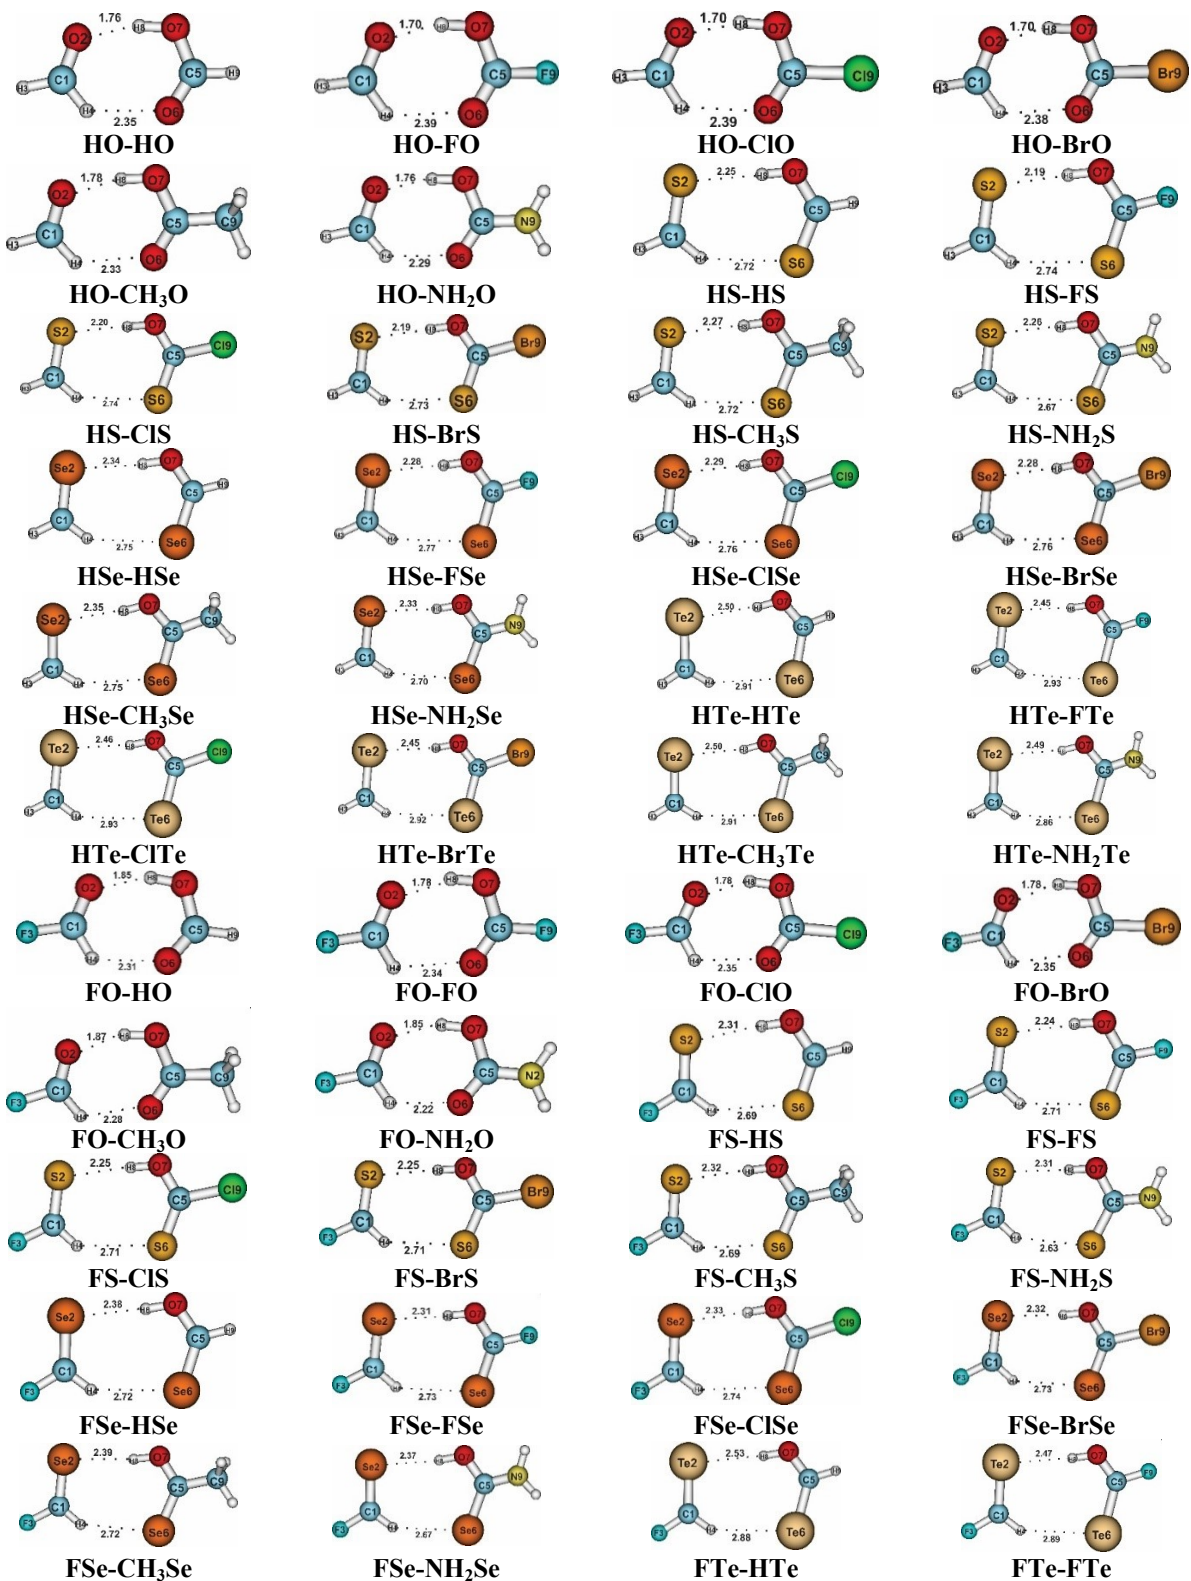

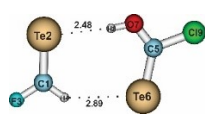

**FTe-CITe**

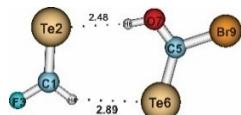

**FTe-BrTe**

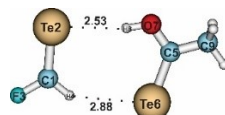

**FTe-CH<sub>3</sub>Te**

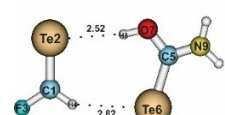

**FTe-NH<sub>2</sub>Te**

**Figure S1.** The stable geometrical structures of  $XZ-RZ$  complexes, with  $X = H, F$ ;  $R = H, F, Cl, Br, CH_3, NH_2$ ;  $Z = O, S, Se, Te$

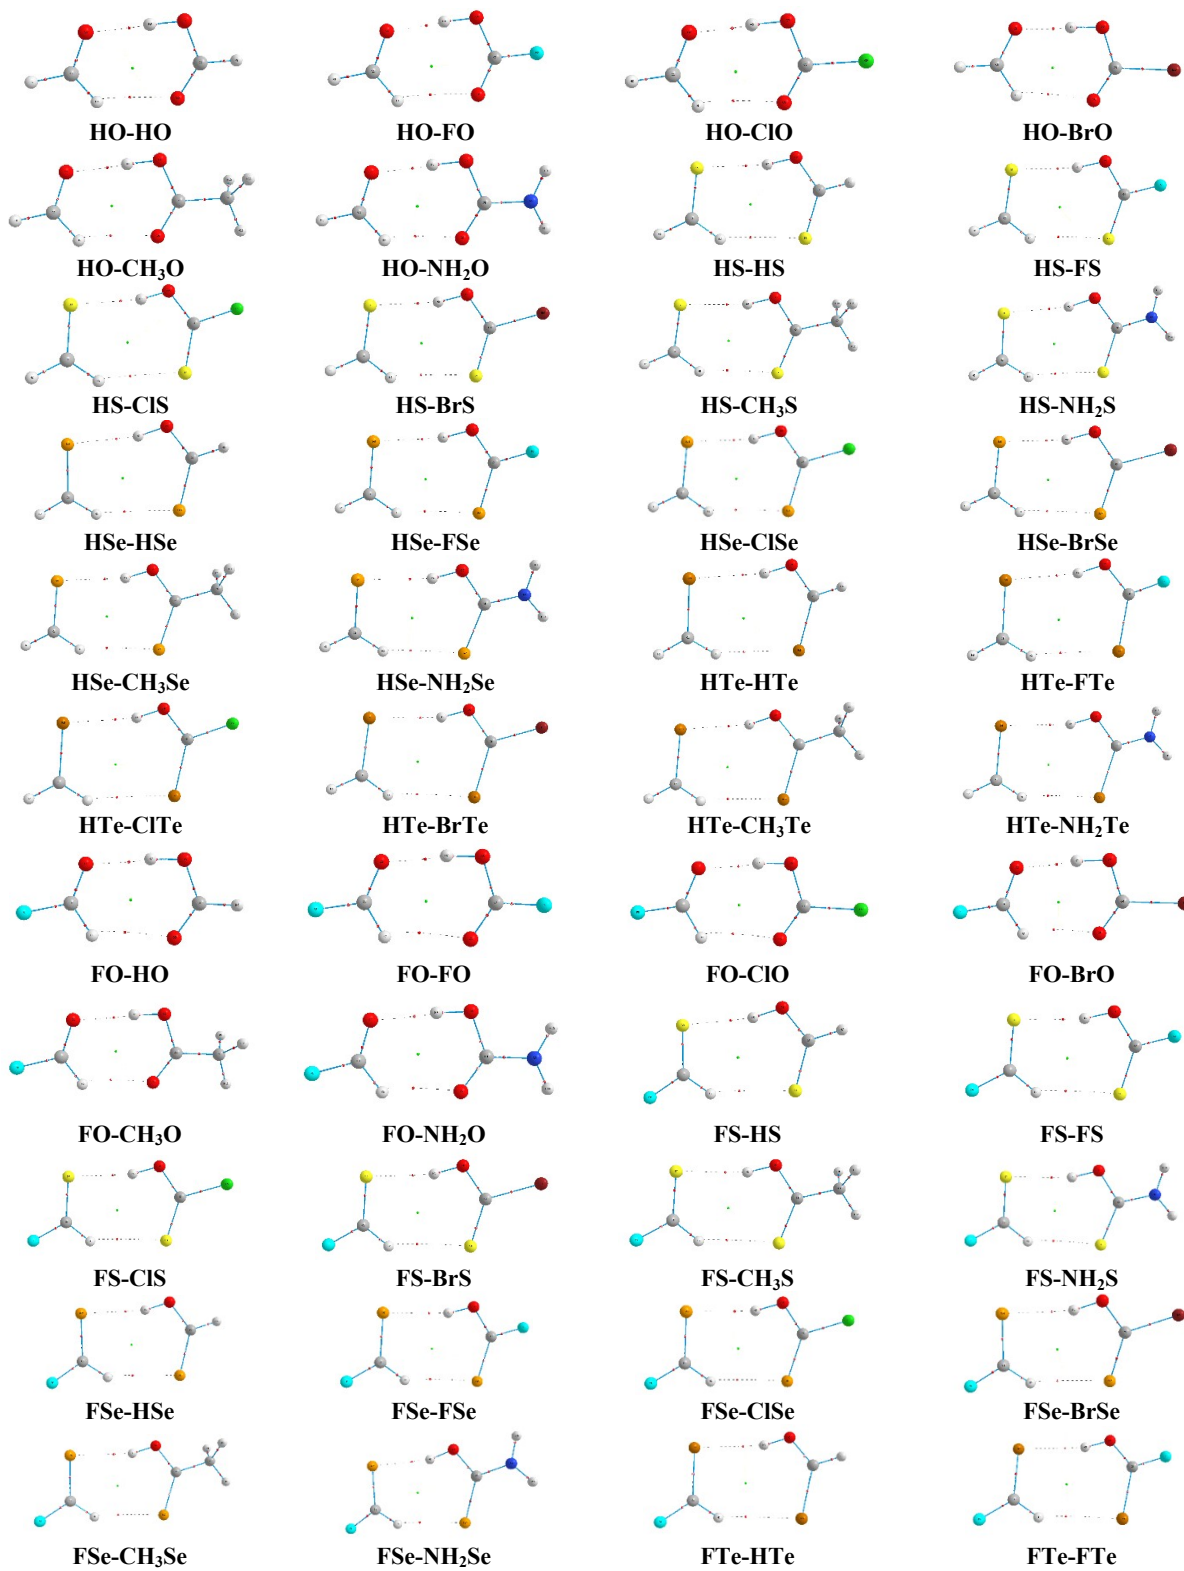

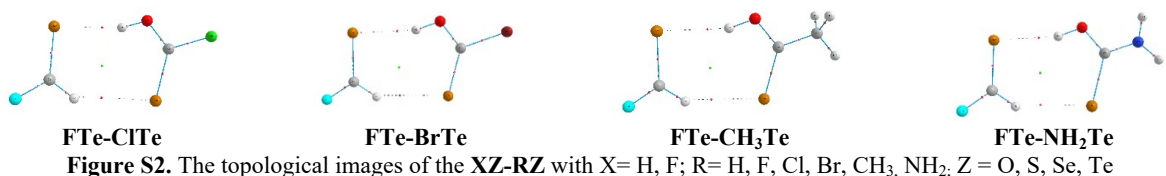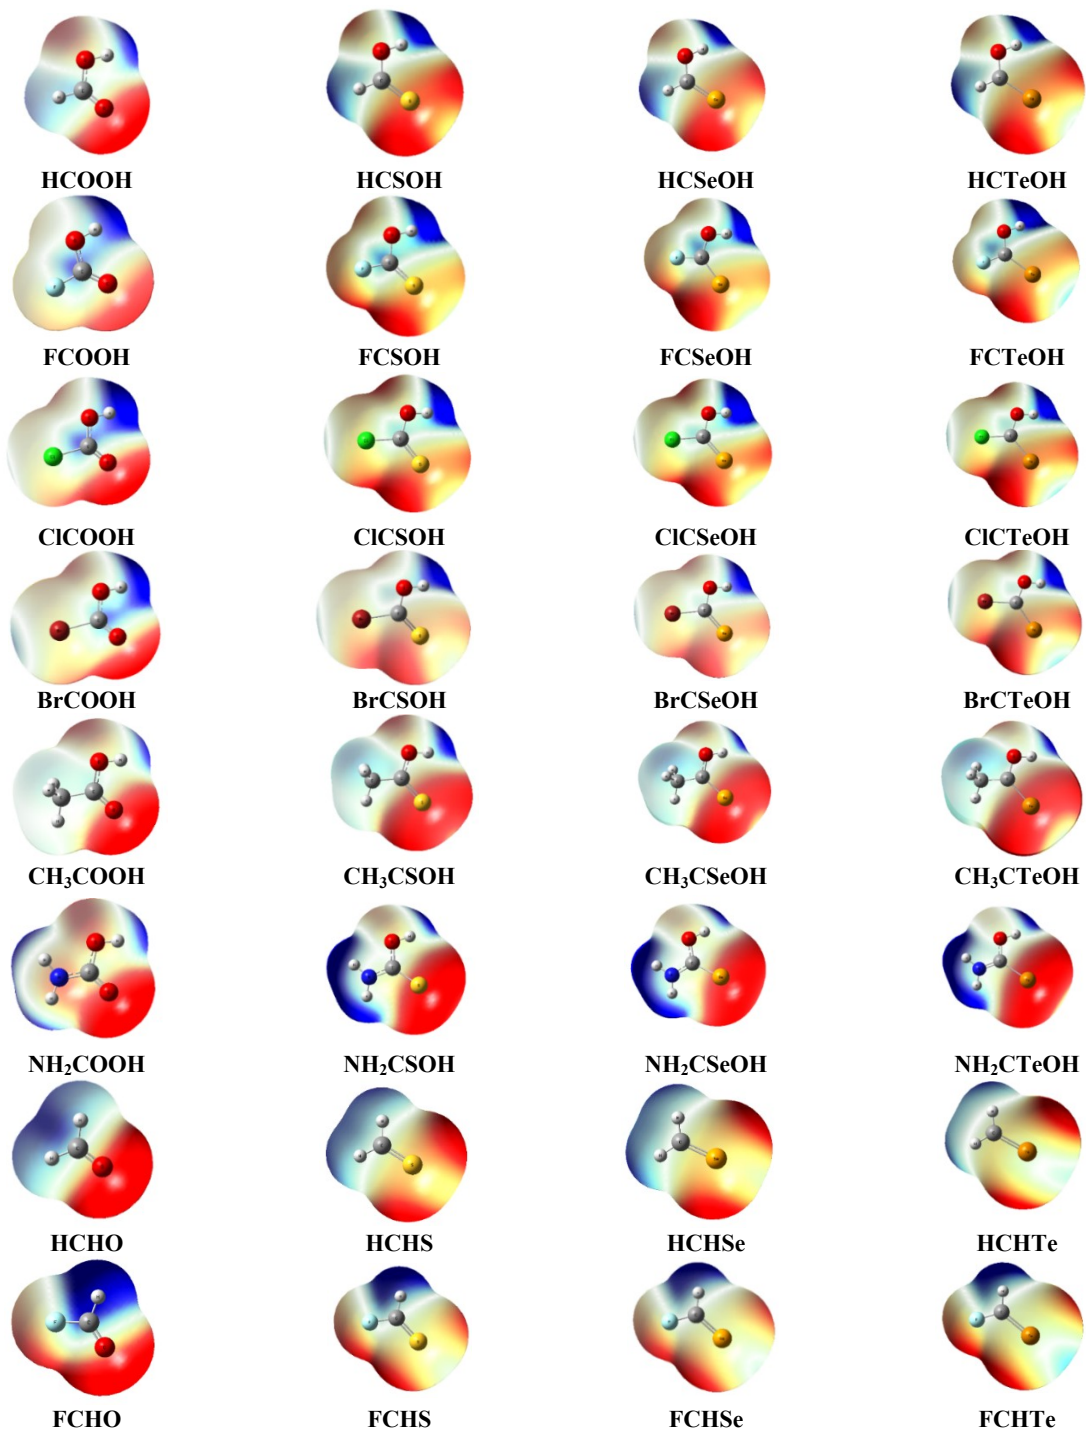

**Figure S3.** Molecular Electrostatic Potential (MEP) surface of XCHZ and RCZOH monomers with X= H, F; R= H, F, Cl, Br, CH<sub>3</sub>, NH<sub>2</sub>; Z= O, S, Se, Te



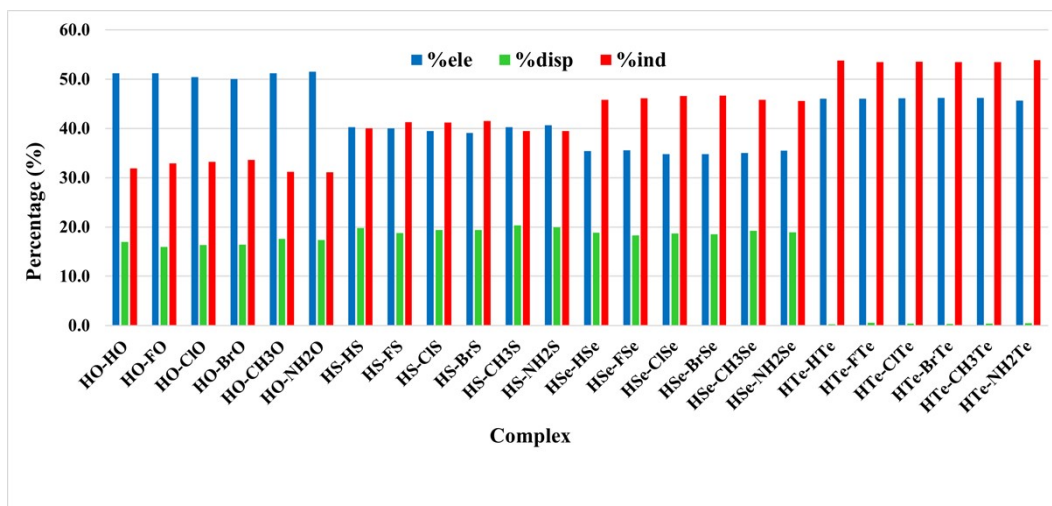

Figure S4a. The percentage contribution (%) of energy components to the stability of **HZ-RZ** at def2-TZVPD level, with R= H, F, Cl, Br, CH<sub>3</sub>, NH<sub>2</sub>; Z= O, S, Se, Te

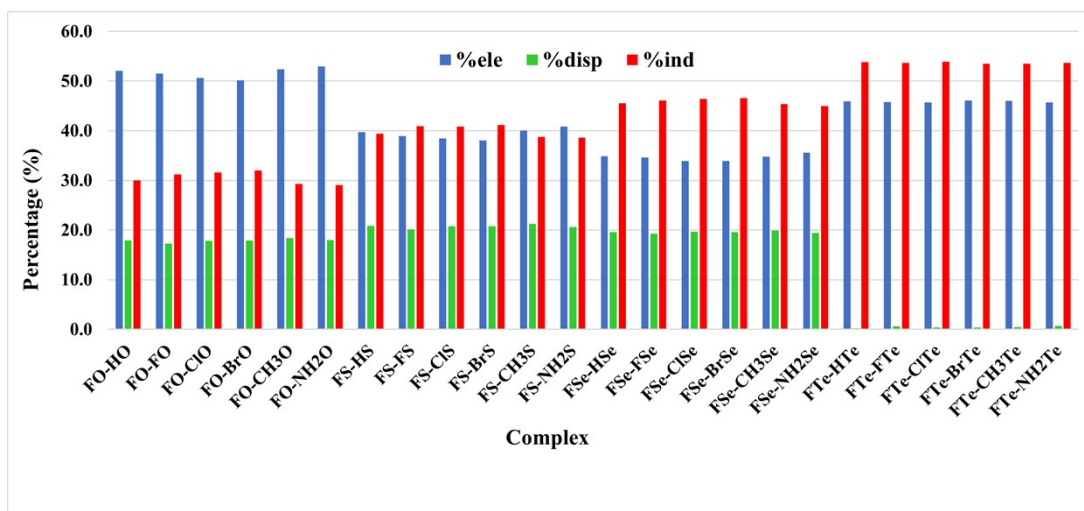

Figure S4b. The percentage contribution (%) of energy components to the stability of **FZ-RZ** at def2-TZVPD level, with R= H, F, Cl, Br, CH<sub>3</sub>, NH<sub>2</sub>; Z= O, S, Se, Te

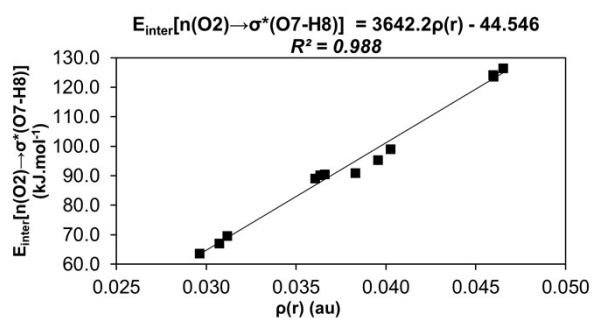

XO-RO

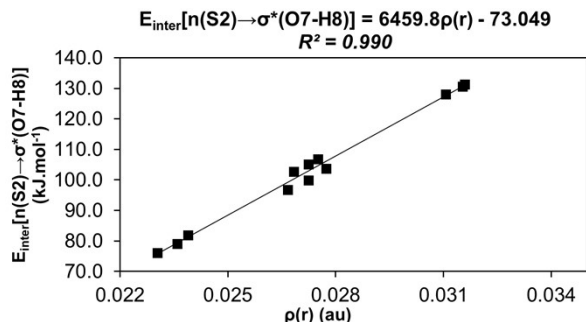

XS-RS

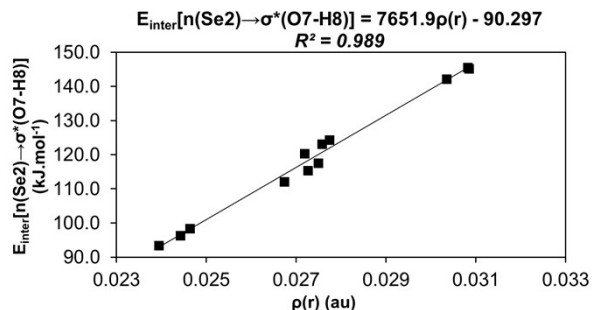

XSe-RSe

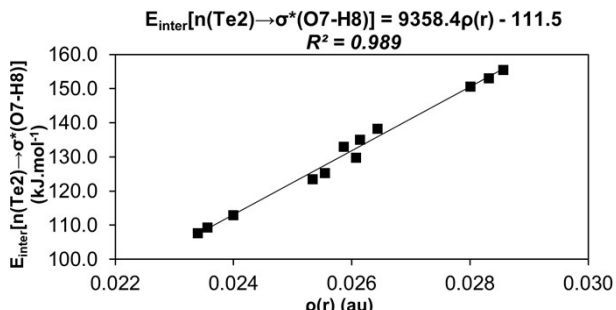

XTe-RTe

**Figure S5.** The linear correlation between the intermolecular electron transfer ( $E_{\text{inter}}[\text{n}(Z2) \rightarrow \sigma^*(\text{O}7\text{-H}8)]$ , kJ.mol<sup>-1</sup>) and electron density ( $\rho(r)$ , au) at BCPs of O-H...Z hydrogen bonds in **XZ-RZ** (X= H, F; R= H, F, Cl, Br, CH<sub>3</sub>, NH<sub>2</sub>; Z= O, S, Se, Te)

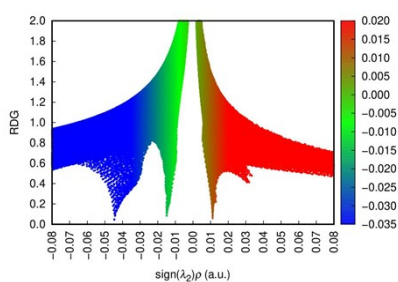

HO-HO

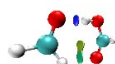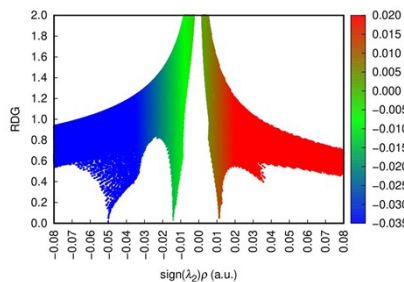

HO-FO

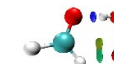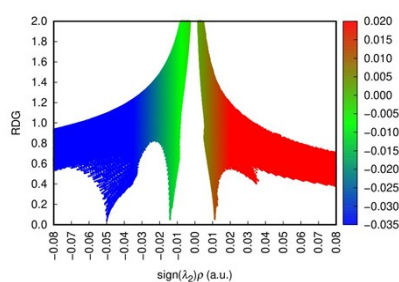

HO-ClO

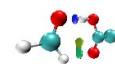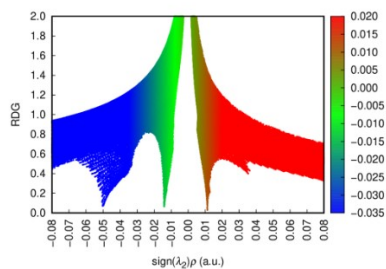

HO-BrO

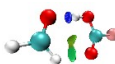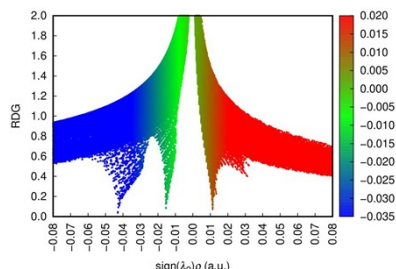

HO-CH<sub>3</sub>O

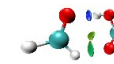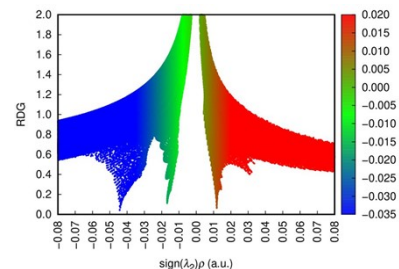

HO-NH<sub>2</sub>O

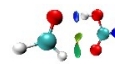

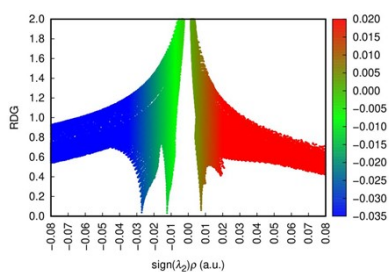

HS-HS

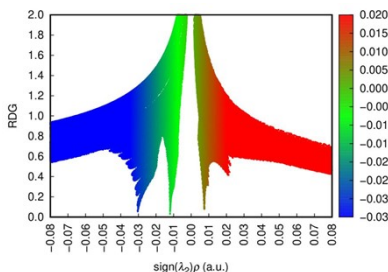

HS-FS

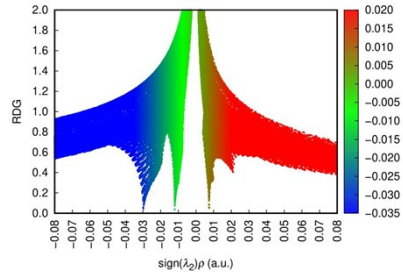

HS-CIS

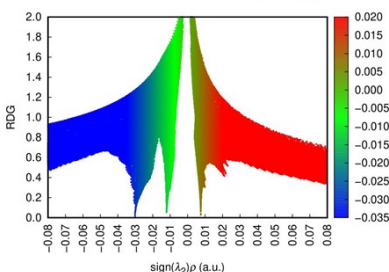

HS-BrS

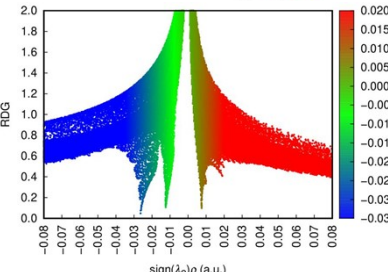

HS-CH<sub>3</sub>S

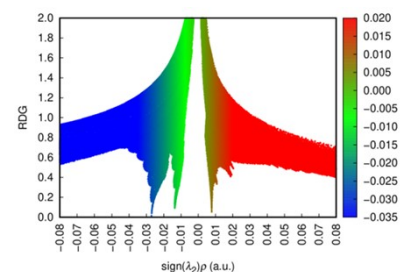

HS-NH<sub>2</sub>S

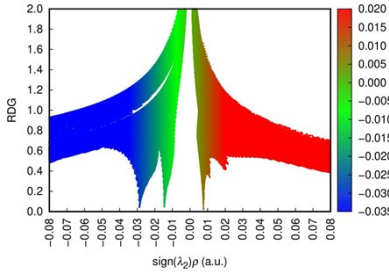

HSe-HSe

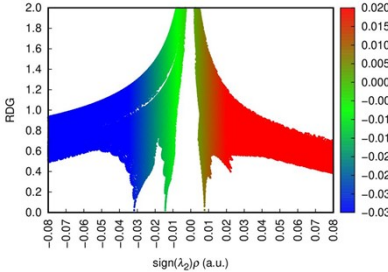

HSe-FSe

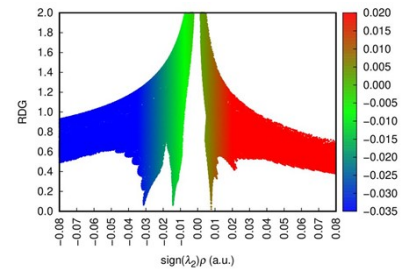

HSe-CISe

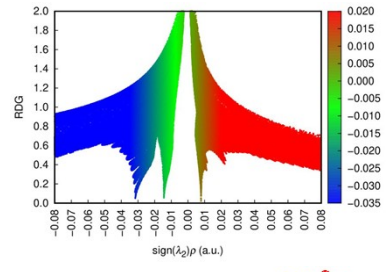

HSe-BrSe

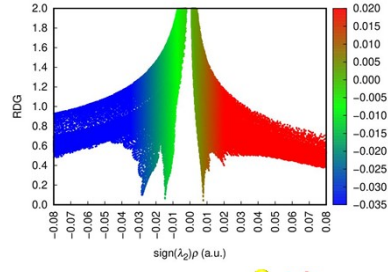

HSe-CH<sub>3</sub>Se

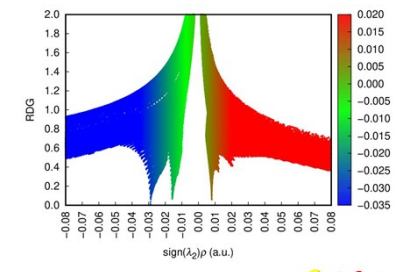

HSe-NH<sub>2</sub>Se

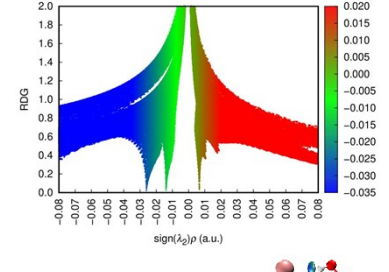

HTe-HTe

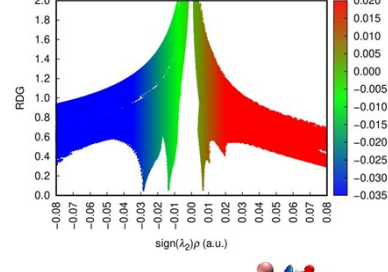

HTe-FTe

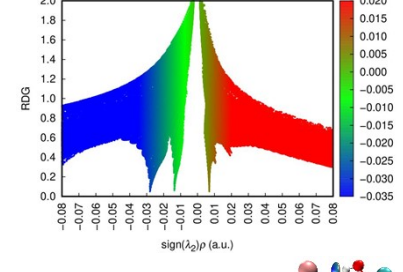

HTe-CITe

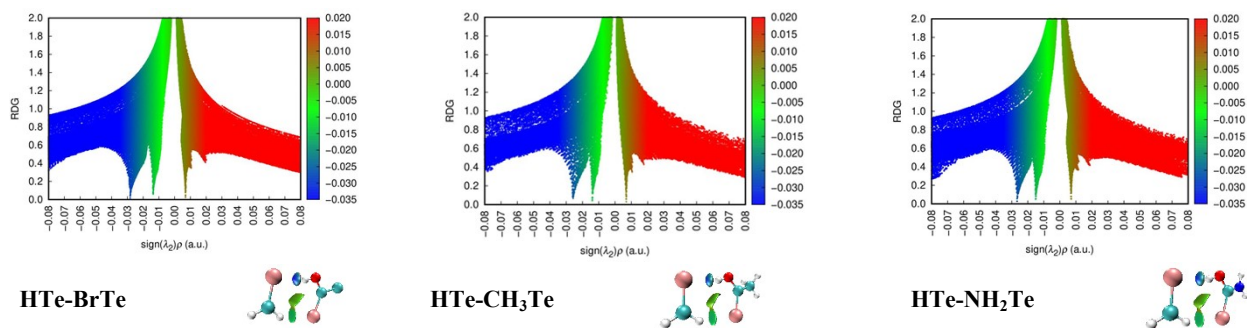

**Figure S6a.** Plots of the reduced density gradient (s, au) versus the electron density multiplied by the sign of the second Hessian eigenvalue ( $\text{sign}(\lambda_2)\rho$ , au) for the **HZ-RZ** complexes (R= H, F, Cl, Br, CH<sub>3</sub>, NH<sub>2</sub>; Z= O, S, Se, Te)

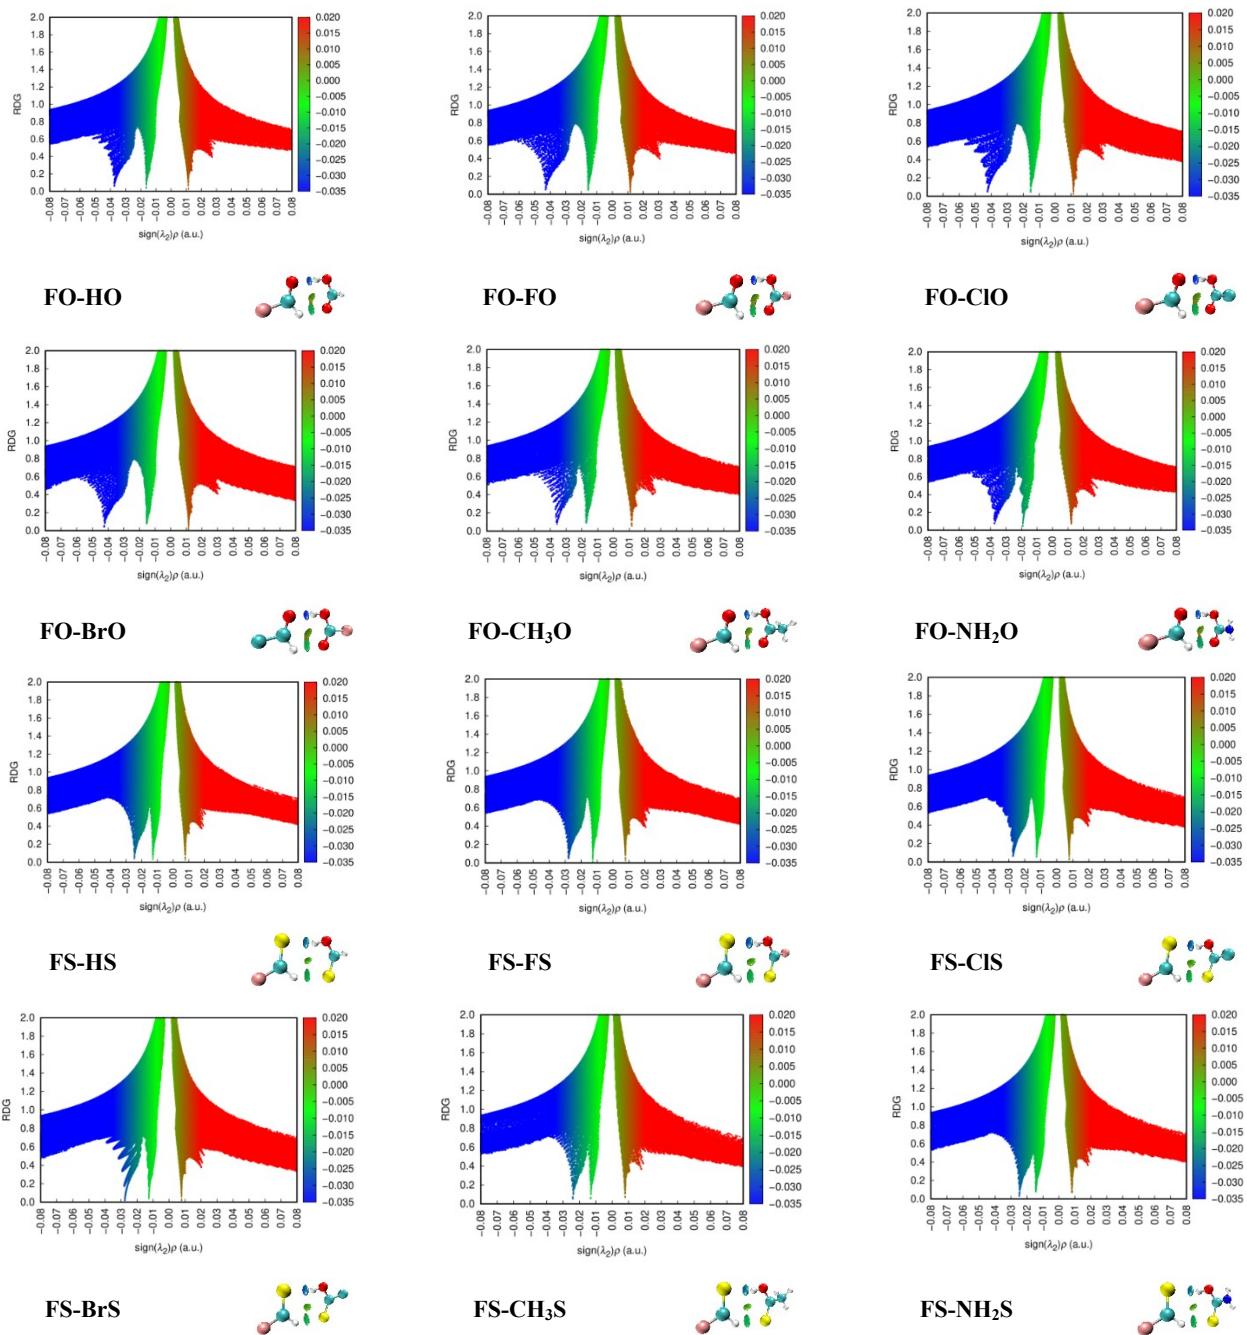

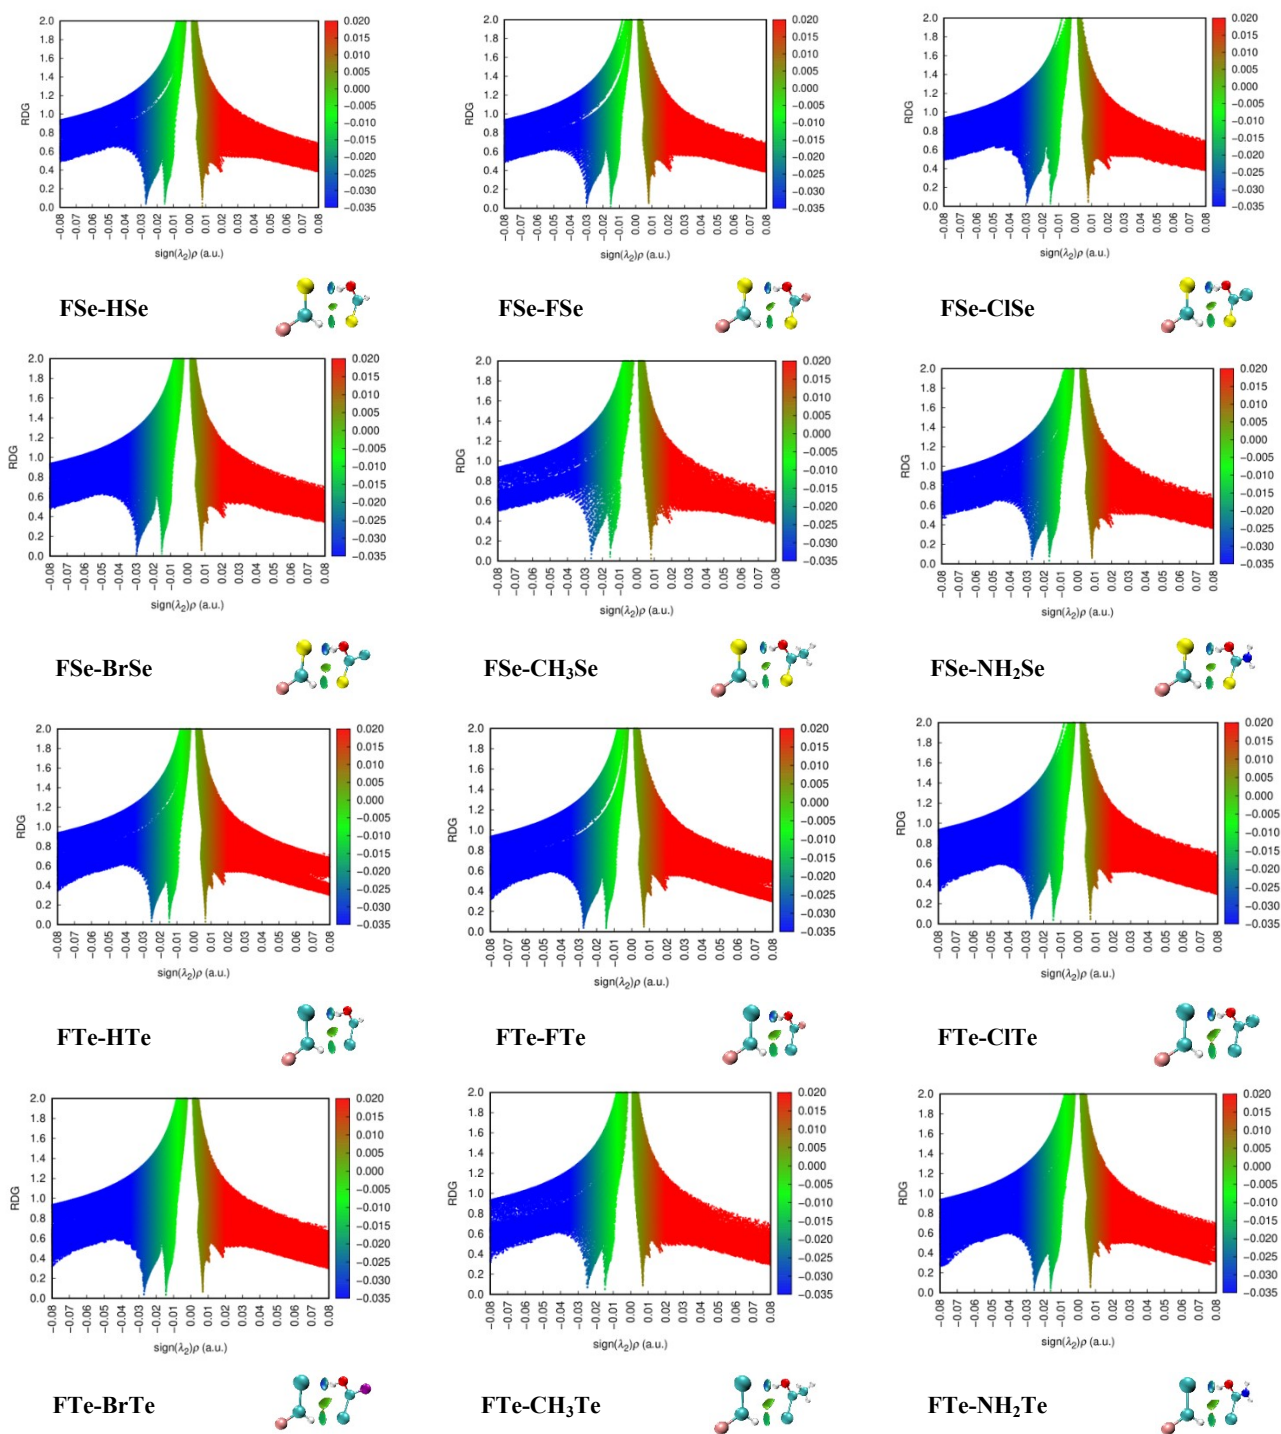

**Figure S6b.** Plots of the reduced density gradient (s, au) versus the electron density multiplied by the sign of the second Hessian eigenvalue ( $\text{sign}(\lambda_2)\rho$ , au) for the FZ-RZ complexes (R= H, F, Cl, Br, CH<sub>3</sub>, NH<sub>2</sub>; Z= O, S, Se, Te)
